# Supplementary material for: Therapeutic Dosage of Antipsychotic Drug Aripiprazole Induces Persistent Mitochondrial Hyperpolarisation, Moderate Oxidative Stress in Liver Cells, and Haemolysis
Source: MDPI journal article supplement (doi:10.3390/antiox12111930), 2023-10-30
Supplement: s1 [file s1]

(a)

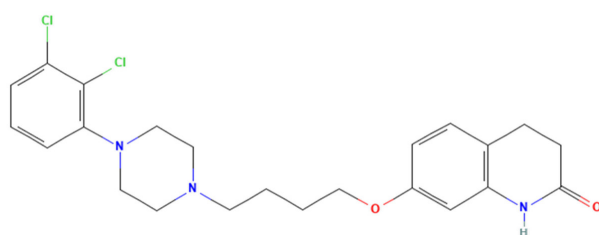

(b)

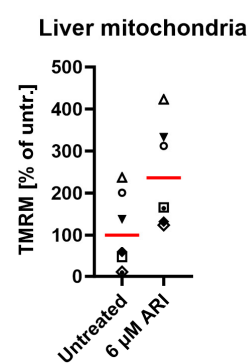

**Figure S1:** (a) Chemical structure of aripiprazole (PubChem); (b) detailed depiction of biological replicates from Figure 1f.

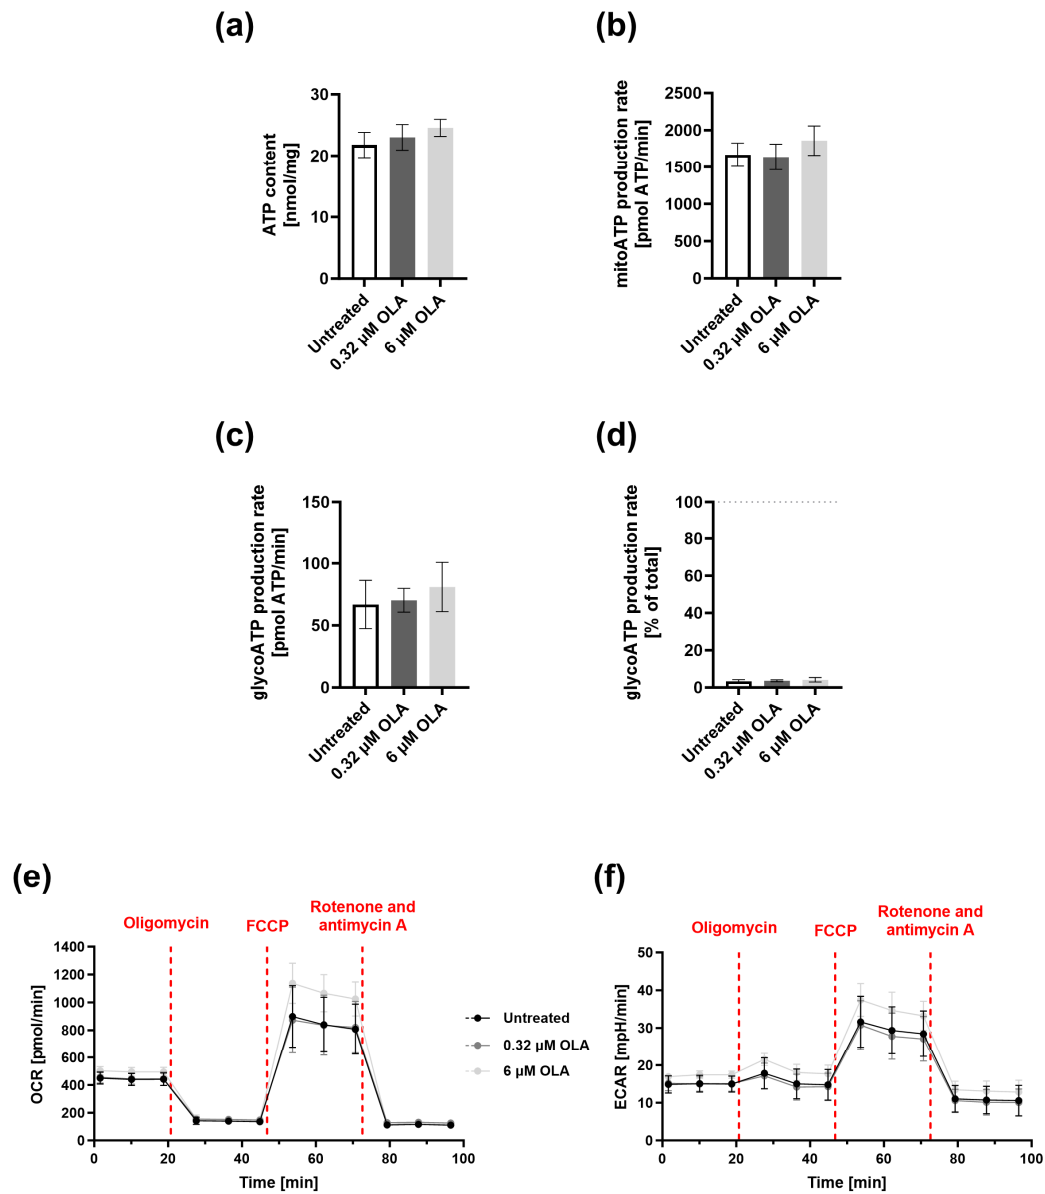

**Figure S2:** ATP production in Fao cells treated with or without OLA for 24 h (a) Total cellular ATP measured with luminescent assay ( $n = 4$ ). (b) Mitochondrial and (c) glycolytic ATP production rates were calculated from respirometry measurements ( $n = 4$ ). (d) Glycolytic ATP production rate expressed as a percentage of overall ATP production rate. (e) oxygen consumption rate (OCR) values; (f) extracellular acidification rate (ECAR) values ( $n = 4$ ). Data are presented as the mean  $\pm$  SD and were analysed with one-way ANOVA.

(a)

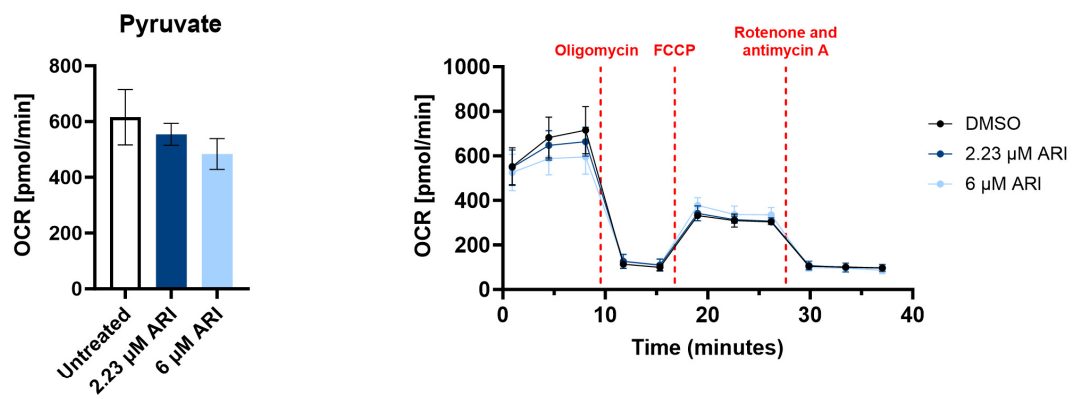

(b)

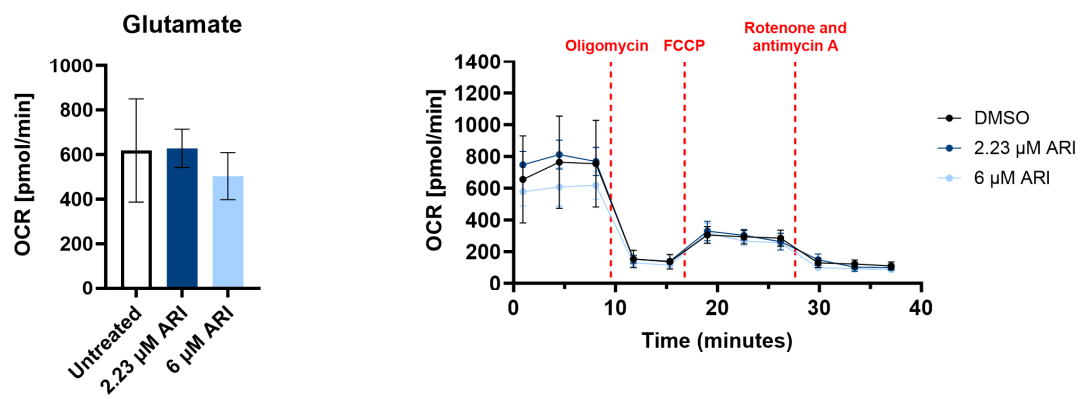

(c)

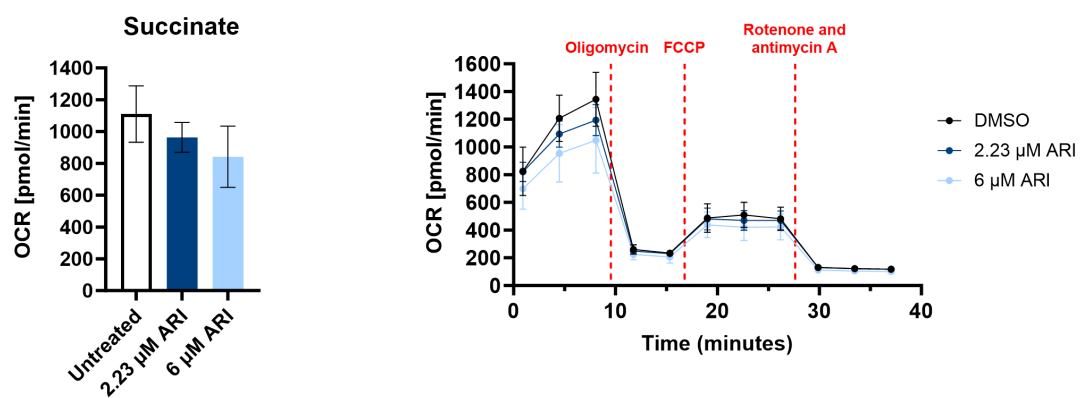

Figure S3: Contribution of individual mitochondrial complexes to OCR ( $n = 3$ ).
